# Supplementary figures and images for: Integrative taxonomy on the fast track - towards more sustainability in biodiversity research
Source: Springer Nature journal article supplement (doi:10.1186/1742-9994-10-15), 2013-01-01

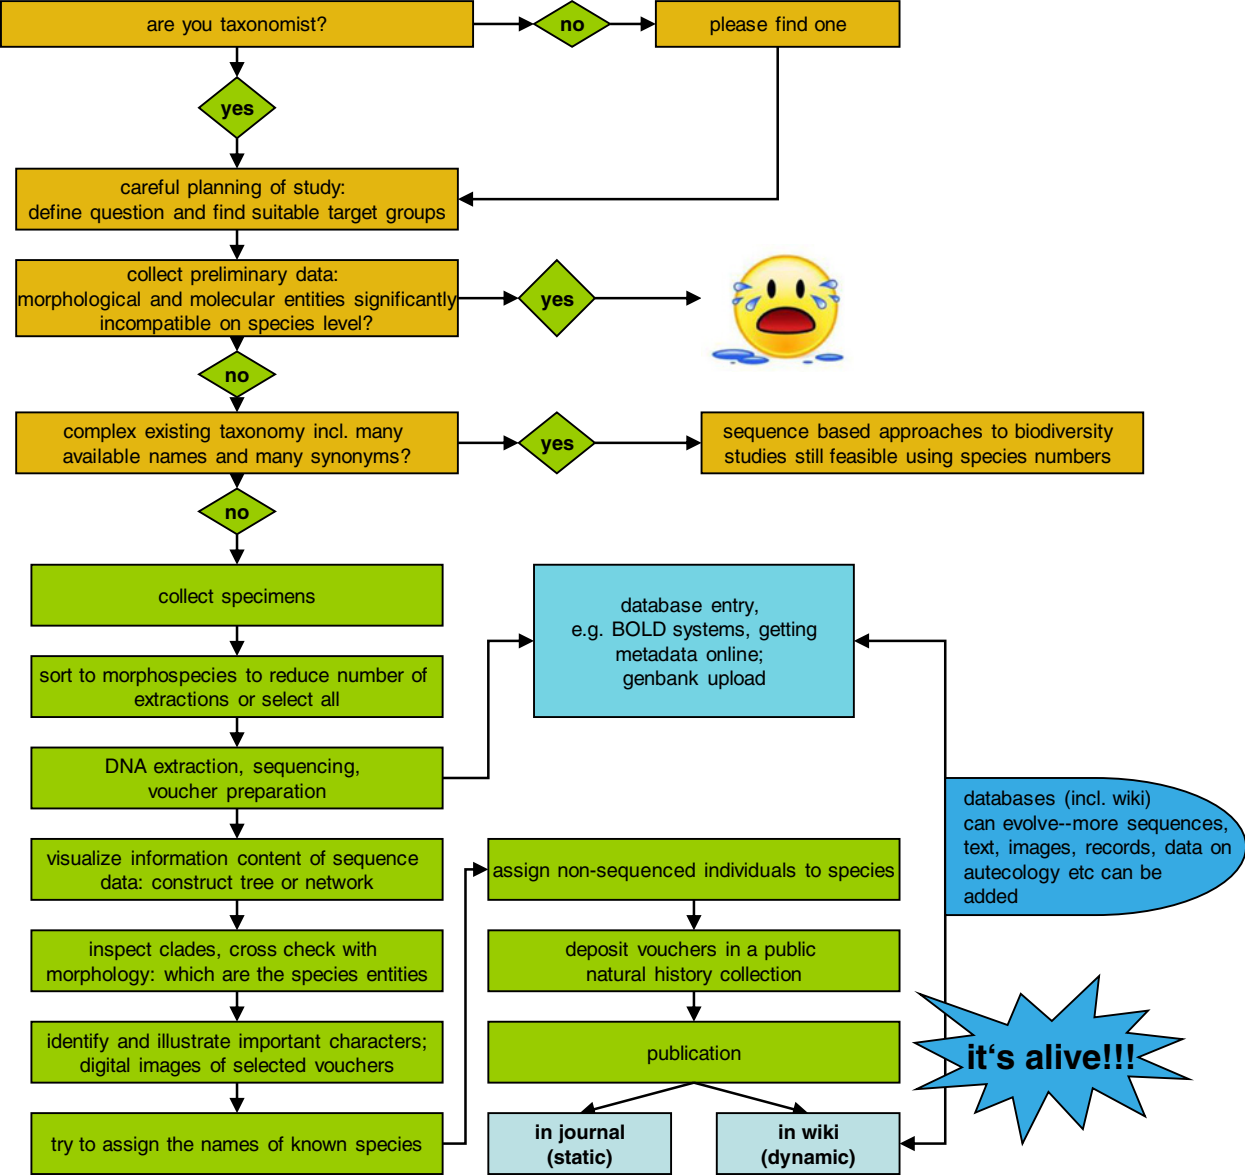

Supplement: 12983_2012_229_MOESM1_ESM.pdf [file 12983_2012_229_MOESM1_ESM.pdf]
